# Supplementary material
Source: publisher figshare collection journal article supplement (https://gsajournals.figshare.com/ndownloader/files/22291737)
Supplement: Supplementary file 1 [file 22291737]

**Table S4. Ant genes leading to enrichment of the rhodopsin family 7 transmembrane PFAM domain in ant WGCNA modules A14 and A15. Some of these genes are putatively involved in light sensing as rhodopsin, but many BLAST annotations seemingly indicate diverse cell signaling functions related to neurotransmitters. 5-hydroxtryptamine is synonymous with serotonin**.

| **BLAST annotation** |
| --- |
| 5-hydroxytryptamine receptor 1 |
| 5-hydroxytryptamine receptor 2A |
| 5-hydroxytryptamine receptor 2B |
| adenosine receptor A2b |
| allatostatin-A receptor |
| alpha-2A adrenergic receptor |
| cholecystokinin receptor type A |
| dopamine D2-like receptor |
| dopamine receptor 1 |
| dopamine receptor 2 |
| G-protein coupled receptor 52 |
| lutropin-choriogonadotropic hormone receptor |
| melatonin receptor type 1B |
| muscarinic acetylcholine receptor DM1 |
| neuropeptide CCHamide-2 receptor |
| neuropeptide FF receptor 1 |
| neuropeptides capa receptor |
| octopamine receptor beta-1R |
| octopamine receptor beta-3R |
| opsin, ultraviolet-sensitive |
| probable G-protein coupled receptor B0563.6 |
| pyrokinin-1 receptor |
| somatostatin receptor type 2 |
| tachykinin-like peptides receptor 99D |
| trace amine-associated receptor 2-like |
| tyramine receptor 1 |
| uncharacterized |
| uncharacterized |
| uncharacterized |
